# Supplementary material for: Coronavirus HKU15 in respiratory tract of pigs and first discovery of coronavirus quasispecies in 5′-untranslated region
Source: PubMed Central journal article supplement (PMC5584481; doi:10.1038/emi.2017.37), 2017-06-21
Supplement: emi201737x2.pdf [file emi201737x2.pdf]

85 8734/USA-IA/2014 (KJ567050; Feces; Iowa, USA)  
 USA/Minnesota/2013 (KR265853; Unknown; Minnesota, USA)  
 USA/NorthCarolina452/2014 (KR265858; Unknown; North Carolina, USA)  
 MI6148 (KJ620016; Feces/intestine; Michigan, USA)  
 OH11846 (KT381613; Feces/intestine; Ohio, USA)  
 USA/Arkansas61/2015 (KR150443; Unknown; Arkansas, USA)  
 IL2768 (KJ584355; Feces/intestine; Illinois, USA)  
 USA/Illinois272/2014 (KR265856; Unknown; Illinois, USA)  
 100 USA/Illinois273/2014 (KR265857; Unknown; Illinois, USA)  
 99 USA/Minnesota454/2014 (KR265854; Unknown; Minnesota, USA)  
 USA/Minnesota455/2014 (KR265855; Unknown; Minnesota, USA)  
 USA/Iowa459/2014 (KR265865; Unknown; Iowa, USA)  
 KNU14-04 (KM820765; Feces; South Korea)  
 PDCoV/USA/Illinois136/2014 (KJ601779; Unknown; Illinois, USA)  
 100 PDCoV/USA/Illinois121/2014 (KJ481931; Feces; Illinois, USA)  
 USA/Minnesota292/2014 (KR265864; Unknown; Minnesota, USA)  
 USA/Indiana453/2014 (KR265851; Unknown; Indiana, USA)  
 PA3148 (KJ584358; Feces/intestine; Pennsylvania, USA)  
 84 PDCoV/USA/Minnesota140/2015 (KX022603; Feces; Minnesota, USA)  
 100 PDCoV/USA/Nebraska137/2015 (KX022604; Feces; Nebraska, USA)  
 74 PDCoV/USA/Nebraska145/2015 (KX022605; Fecal swab; Nebraska, USA)  
 79 PDCoV/USA/Iowa136/2015 (KX022602; Feces; Iowa, USA)  
 100 USA/Michigan448/2014 (KR265850; Unknown; Michigan, USA)  
 USA/Michigan447/2014 (KR265849; Unknown; Michigan, USA)  
 100 IN2847 (KJ569769; Feces/intestine; Indiana, USA)  
 USA/Minnesota159/2014 (KR265859; Unknown; Minnesota, USA)  
 USA/Illinois449/2014 (KR265852; Unknown; Illinois, USA)  
 100 PDCoV/USA/Illinois133/2014 (KJ601777; Unknown; Illinois, USA)  
 PDCoV/USA/Illinois134/2014 (KJ601778; Unknown; Illinois, USA)  
 83 USA/Nebraska210/2014 (KR265861; Unknown; Nebraska, USA)  
 100 NE3579 (KJ584359; Feces/intestine; Nebraska, USA)  
 USA/Nebraska209/2014 (KR265860; Unknown; Nebraska, USA)  
 USA/Minnesota214/2014 (KR265848; Unknown; Minnesota, USA)  
 100 USA/Minnesota442/2014 (KR265847; Unknown; Minnesota, USA)  
 99 SD3424 (KJ584356; Feces/intestine; South Dakota, USA)  
 PDCoV/USA/Ohio137/2014 (KJ601780; Unknown; Ohio, USA)  
 OH1987 (KJ462462; Feces/intestine; Ohio, USA)  
 79 USA/Ohio445/2014 (KR265863; Unknown; Ohio, USA)  
 93 OhioCVM1/2014 (KJ769231; Duodenum; Ohio, USA)  
 USA/Ohio444/2014 (KR265862; Unknown; Ohio, USA)  
 87 KY4813 (KJ584357; Feces/intestine; Kentucky, USA)  
 USA/IL/2014/026PDV\_P11 (KP981395; Cell culture isolate; Illinois, USA)  
 100 Michigan/8977/2014 (KM012168; Unknown; Michigan, USA)  
 NH (KU981059; Small intestinal homogenate; China)  
 99 CHN-HN-2014 (KT336560; Unknown; China)  
 HKU15-155 (JQ065043; Rectum; Hong Kong)  
 CHN-HB-2014 (KP757891; Feces; Hubei, China)  
 82 CHN-JS-2014 (KP757892; Feces; Jiangsu, China)  
 74 CH/SXD1/2015 (KT021234; Feces/intestine; China)  
 100 **S579N (LC216914; Nasopharynx; Hong Kong)**  
 100 PDCoV/CHJXNI2/2015 (KR131621; Intestine; Jiangxi, China)  
 100 **S582N (LC216915; Nasopharynx; Hong Kong)**  
 100 CH/Sichuan/S27/2012 (KT266822; Feces; Sichuan, China)  
 HKU15-44 (JQ065042; Rectum; Hong Kong)  
 CHN-AH-2004 (KP757890; Feces/intestine; Anhui, China)  
 P1\_16\_BTL\_0116/PDCoV/2016/Lao (KX118627; Intestine; Laos)  
 100 P23\_15\_TT\_1115 (KU984334; Intestine; Thailand)  
 76 PDCoV/Swine/Thailand/S5011/2015 (KU051641; Jejunum, Thailand)  
 100 PDCoV/Swine/Thailand/S5015L/2015 (KU051649; Mesenteric lymph node; Thailand)  
 Sparrow coronavirus HKU17 HKU17-6124 (JQ065045)

0.05

Supplementary Figure S2

**Supplementary Figure S2** Phylogenetic tree showing the relationship of the two *Coronavirus HKU15* nasopharyngeal strains to other *Coronavirus HKU15* strains. The trees were inferred from the almost complete genome sequence data by the maximum likelihood method with the substitution model TN93 (Tamura–Nei model) + G (gamma-distributed rate variation) + I (estimated proportion of invariable sites). The scale bar indicates the estimated number of substitutions per base. Numbers at nodes (expressed in percentage) indicate levels of bootstrap support calculated from 1,000 replicates, and values lower than 70 are not shown. The two nasopharyngeal strains sequenced in this study are highlighted in bold. All names and accession numbers are given as cited in the International Nucleotide Sequence Databases.
