# Supplementary material for: Coronavirus HKU15 in respiratory tract of pigs and first discovery of coronavirus quasispecies in 5′-untranslated region
Source: PubMed Central journal article supplement (PMC5584481; doi:10.1038/emi.2017.37), 2017-06-21
Supplement: emi201737x3.pdf [file emi201737x3.pdf]

**Supplementary Table S1 PCR primers used for complete genome sequencing**

| Region   | Primers for 1 <sup>st</sup> round of PCR | Primer position with respect to the genome of <i>Coronavirus HKU15</i> HKU15-155 (JQ065043) | Primers for 2 <sup>nd</sup> round of PCR | Primer position with respect to the genome of <i>Coronavirus HKU15</i> HKU15-155 (JQ065043) |
|----------|------------------------------------------|---------------------------------------------------------------------------------------------|------------------------------------------|---------------------------------------------------------------------------------------------|
| 1-S579N  | LPW18323                                 | 65-83                                                                                       | LPW33264                                 | 122-142                                                                                     |
|          | LPW30836                                 | 580-601                                                                                     | LPW6975                                  | 483-505                                                                                     |
|          | LPW33199                                 | 50-70                                                                                       | LPW33264                                 | 122-142                                                                                     |
|          | LPW33200                                 | 602-622                                                                                     | LPW6975                                  | 483-505                                                                                     |
| 1-S582N  | LPW18323                                 | 65-83                                                                                       |                                          |                                                                                             |
|          | LPW30836                                 | 580-601                                                                                     |                                          |                                                                                             |
| 2        | LPW18326                                 | 484-506                                                                                     |                                          |                                                                                             |
| 3        | LPW13737                                 | 1614-1641                                                                                   |                                          |                                                                                             |
|          | LPW29668                                 | 1398-1419                                                                                   | LPW29668                                 | 1398-1419                                                                                   |
| 4        | LPW29669                                 | 3072-3092                                                                                   | LPW15250                                 | 2742-2769                                                                                   |
|          | LPW30818                                 | 2593-2614                                                                                   |                                          |                                                                                             |
| 5        | LPW30758                                 | 2908-2929                                                                                   |                                          |                                                                                             |
|          | LPW26394                                 | 2736-2754                                                                                   |                                          |                                                                                             |
| 6        | LPW26393                                 | 4177-4196                                                                                   |                                          |                                                                                             |
|          | LPW30876                                 | 3543-3564                                                                                   |                                          |                                                                                             |
| 7        | LPW30877                                 | 3849-3869                                                                                   |                                          |                                                                                             |
|          | LPW29670                                 | 3389-3410                                                                                   |                                          |                                                                                             |
| 8        | LPW29671                                 | 4916-4937                                                                                   |                                          |                                                                                             |
|          | LPW30733                                 | 4500-4521                                                                                   |                                          |                                                                                             |
| 9        | LPW30814                                 | 4948-4969                                                                                   |                                          |                                                                                             |
|          | LPW29672                                 | 4840-4860                                                                                   |                                          |                                                                                             |
| 10       | LPW29673                                 | 6380-6401                                                                                   |                                          |                                                                                             |
|          | LPW30735                                 | 6210-6227                                                                                   |                                          |                                                                                             |
| 11       | LPW30736                                 | 6917-6938                                                                                   |                                          |                                                                                             |
|          | LPW29674                                 | 6289-6310                                                                                   | LPW29674                                 | 6289-6310                                                                                   |
| 12       | LPW29675                                 | 7707-7726                                                                                   | LPW10595                                 | 7551-7573                                                                                   |
|          | LPW30878                                 | 7247-7265                                                                                   |                                          |                                                                                             |
| 13       | LPW30879                                 | 7846-7865                                                                                   |                                          |                                                                                             |
|          | LPW29676                                 | 7567-7588                                                                                   | LPW29676                                 | 7567-7588                                                                                   |
| 14       | LPW29677                                 | 8267-8289                                                                                   | LPW10502                                 | 8247-8269                                                                                   |
|          | LPW14878                                 | 7858-7879                                                                                   |                                          |                                                                                             |
| 15       | LPW10062                                 | 9026-9048                                                                                   |                                          |                                                                                             |
|          | LPW30737                                 | 8881-8902                                                                                   |                                          |                                                                                             |
| 16       | LPW30815                                 | 9711-9728                                                                                   |                                          |                                                                                             |
|          | LPW29678                                 | 8909-8929                                                                                   |                                          |                                                                                             |
| 17       | LPW29679                                 | 10385-10407                                                                                 |                                          |                                                                                             |
|          | LPW29680                                 | 10310-10330                                                                                 | LPW29680                                 | 10310-10330                                                                                 |
| 18-S579N | LPW29681                                 | 11784-11805                                                                                 | LPW7430                                  | 11163-11185                                                                                 |
|          | LPW30924                                 | 11026-11048                                                                                 |                                          |                                                                                             |
| 18-S582N | LPW30925                                 | 11852-11870                                                                                 |                                          |                                                                                             |
|          | LPW30739                                 | 11007-11027                                                                                 |                                          |                                                                                             |
| 19       | LPW30740                                 | 11886-11907                                                                                 |                                          |                                                                                             |
|          | LPW29682                                 | 11651-11673                                                                                 |                                          |                                                                                             |
| 20       | LPW29683                                 | 13122-13141                                                                                 |                                          |                                                                                             |
|          | LPW30741                                 | 12936-12954                                                                                 |                                          |                                                                                             |
| 21       | LPW30742                                 | 13253-13274                                                                                 |                                          |                                                                                             |
|          | LPW29384                                 | 13072-13093                                                                                 |                                          |                                                                                             |
| 22       | LPW29685                                 | 14072-14093                                                                                 |                                          |                                                                                             |
|          | LPW9763                                  | 13528-13550                                                                                 |                                          |                                                                                             |
| 23       | LPW26389                                 | 14863-14879                                                                                 |                                          |                                                                                             |
|          | LPW29686                                 | 14629-14648                                                                                 |                                          |                                                                                             |
| 24       | LPW29687                                 | 16097-16116                                                                                 |                                          |                                                                                             |
|          | LPW30743                                 | 15893-15912                                                                                 |                                          |                                                                                             |
| 25       | LPW30744                                 | 17648-17670                                                                                 |                                          |                                                                                             |
|          | LPW11164                                 | 17455-17477                                                                                 |                                          |                                                                                             |
| 26       | LPW14273                                 | 18977-18996                                                                                 |                                          |                                                                                             |
|          | LPW30745                                 | 17978-17996                                                                                 |                                          |                                                                                             |
| 27       | LPW30746                                 | 18448-18467                                                                                 |                                          |                                                                                             |
|          | LPW26388                                 | 18293-18311                                                                                 |                                          |                                                                                             |
|          | LPW26387                                 | 19807-19826                                                                                 |                                          |                                                                                             |

### Supplementary Table S1 (continued)

| Region | Primers for 1 <sup>st</sup> round of PCR | Primer position with respect to the genome of <i>Coronavirus HKU15</i> HKU15-155 (JQ065043) | Primers for 2 <sup>nd</sup> round of PCR | Primer position with respect to the genome of <i>Coronavirus HKU15</i> HKU15-155 (JQ065043) |
|--------|------------------------------------------|---------------------------------------------------------------------------------------------|------------------------------------------|---------------------------------------------------------------------------------------------|
| 28     | LPW29896                                 | 18876-18899                                                                                 | LPW29896                                 | 18876-18899                                                                                 |
| 29     | LPW29897                                 | 20418-20439                                                                                 | LPW14271                                 | 20394-20415                                                                                 |
|        | LPW14444                                 | 19604-19624                                                                                 |                                          |                                                                                             |
| 30     | LPW14272                                 | 20301-20320                                                                                 | LPW29904                                 | 23627-23647                                                                                 |
|        | LPW26386                                 | 21193-21210                                                                                 |                                          |                                                                                             |
| 31     | LPW14445                                 | 21047-21069                                                                                 | LPW6038                                  | 24145-24167                                                                                 |
|        | LPW7184                                  | 22007-22029                                                                                 |                                          |                                                                                             |
| 32     | LPW29900                                 | 21015-21036                                                                                 | LPW14448                                 | 23934-23953                                                                                 |
|        | LPW10932                                 | 21459-21482                                                                                 |                                          |                                                                                             |
| 33     | LPW29901                                 | 22500-22521                                                                                 | LPW29905                                 | 24773-24796                                                                                 |
|        | LPW29902                                 | 22352-22374                                                                                 |                                          |                                                                                             |
| 34     | LPW29903                                 | 23847-23870                                                                                 |                                          |                                                                                             |
|        | LPW29904                                 | 23627-23647                                                                                 |                                          |                                                                                             |
|        | LPW29905                                 | 24773-24796                                                                                 |                                          |                                                                                             |
|        | LPW26396                                 | 24580-24599                                                                                 |                                          |                                                                                             |
|        | LPW418                                   | 3' polyA                                                                                    |                                          |                                                                                             |
