# Supplementary material for: Coronavirus HKU15 in respiratory tract of pigs and first discovery of coronavirus quasispecies in 5′-untranslated region
Source: PubMed Central journal article supplement (PMC5584481; doi:10.1038/emi.2017.37), 2017-06-21
Supplement: emi201737x4.pdf [file emi201737x4.pdf]

## Supplementary Table S2 Sequences of the PCR primers

| Primer   | Sequence                            |
|----------|-------------------------------------|
| LPW6038  | 5'-CCACCTGGCTTTTGTCTGGTGA-3'        |
| LPW6975  | 5'-CAGAATAGGATTTTCGCGCTCCTA-3'      |
| LPW7184  | 5'-ACTGTGAYTTDACACACTCATT-3'        |
| LPW7430  | 5'-CTGATGCTCATTAGGTTGAGGTT-3'       |
| LPW9763  | 5'-CTTAATAAAGGACATTGCGGACTT-3'      |
| LPW10062 | 5'-GCAAGTAGCATGGTAATAGCCAT-3'       |
| LPW10502 | 5'-ACCCTGTGTTGGACACTTGACAA-3'       |
| LPW10595 | 5'-CTTGTACATAAGTGAATGCCTA-3'        |
| LPW10932 | 5'-GGCATCATGGTGCTTCTGGTGT-3'        |
| LPW11164 | 5'-GTTTACATAACCACGCAATGTCAA-3'      |
| LPW13737 | 5'-TATTCTTCATCAGTAGCCACGACGACAT-3'  |
| LPW14271 | 5'-CTGCTGACAGGTCAAACTACA-3'         |
| LPW14272 | 5'-GGTAACACATCCTATTGTGT-3'          |
| LPW14273 | 5'-TTCGGGTGAGAATGAATGTT-3'          |
| LPW14444 | 5'-AACTAACCACACTCTCAGCAT-3'         |
| LPW14445 | 5'-TCTTCTGTTCAGACGGAGTATT-3'        |
| LPW14448 | 5'-CATCGCTCCAAGTCATTCTT-3'          |
| LPW14878 | 5'-TGGTGCTGAATTTGACCAAGTAT-3'       |
| LPW15250 | 5'-TCGTCGCTGCTGGTCTTCCGTTCCCTGGA-3' |
| LPW18323 | 5'-CCGACACCAATCCAGGTGC-3'           |
| LPW18326 | 5'-AGGAGTGTGGAATCCTATTCTGC-3'       |
| LPW26386 | 5'-CCAACCTGTCAGAGGAAT-3'            |
| LPW26387 | 5'-GGTAGAGTTGTGTAATGCAG-3'          |
| LPW26388 | 5'-TTGTTACCTCACCTAACGC-3'           |
| LPW26389 | 5'-AGCGGTGTRACAACATG-3'             |
| LPW26393 | 5'-AGAGAGCATCAATAGCAGGT-3'          |
| LPW26394 | 5'-TCAAGATCCAGGAACGGAA-3'           |
| LPW26396 | 5'-GGTAAAACCATTTCTCAGGT-3'          |
| LPW29668 | 5'-GTGGTGTATTGGTATTGCACT-3'         |
| LPW29669 | 5'-TTAAATCCGCAGGTGTTACTG-3'         |
| LPW29670 | 5'-GAGTTAGTTGTTGGTGAATTGG-3'        |
| LPW29671 | 5'-GGTAATTGTAGAAAACGGGTCAA-3'       |
| LPW29672 | 5'-CCTCGTAAAGTCGTGGAGTGT-3'         |
| LPW29673 | 5'-CCTGCTGACTAAGACGTGTAAC-3'        |
| LPW29674 | 5'-TGCAGAAGACCAGTCTACCATT-3'        |
| LPW29675 | 5'-GCTACACACAATGAGCGCAA-3'          |
| LPW29676 | 5'-GTACAAGTGCCTTGTCTTCGCA-3'        |
| LPW29677 | 5'-GATTGGACATTTAGCTGAATACC-3'       |
| LPW29678 | 5'-GGATCTTATGATTTGAGTGC-3'          |
| LPW29679 | 5'-TTTACCCTATCTGAGTCAAGACG-3'       |
| LPW29680 | 5'-CTTGCAGAACGTGCTGAGGAT-3'         |
| LPW29681 | 5'-ATGACGTAGAGCATAAGCCAAG-3'        |
| LPW29682 | 5'-GCTACAACGCTCTTAGTACAGAG-3'       |
| LPW29683 | 5'-TCTGATTGCGTGCAAGTGAA-3'          |
| LPW29684 | 5'-ATTAGCACCATGACTAACAGGC-3'        |
| LPW29685 | 5'-GATTGGAAAGCATCAAGGATAC-3'        |
| LPW29686 | 5'-GCAACCGTCAAGGATGTGTA-3'          |
| LPW29687 | 5'-GCCATCGGCAACTCCTACTA-3'          |
| LPW29896 | 5'-TGACCTCTACTGTTGTGATGACAT-3'      |
| LPW29897 | 5'-GAGAGAATGACATGCCATTGTT-3'        |
| LPW29900 | 5'-GATGGCGAAGTTGAAATACCAT-3'        |
| LPW29901 | 5'-GATCTGCAATCTGTGAGAGGTT-3'        |
| LPW29902 | 5'-TCCTGACGTTATAGATGTCAATC-3'       |
| LPW29903 | 5'-TAAGAAGTTTCCGAGGTAGTATGC-3'      |
| LPW29904 | 5'-TGGACTTCACACCATAACCAC-3'         |
| LPW29905 | 5'-CCTTGACTGTGATTGAGTAAGAGA-3'      |
| LPW30733 | 5'-ATGAACCTACAGGTCCGCCAT-3'         |
| LPW30735 | 5'-TCCAGCGCGGTCTTGATT-3'            |
| LPW30736 | 5'-GTGACAACGCATCCCTAACCAT-3'        |
| LPW30737 | 5'-CACCAATAGAGATGGTGTGTTGT-3'       |
| LPW30739 | 5'-TTGAGTACCAGCAAAAATGCCT-3'        |
| LPW30740 | 5'-TGGGTTCTCAATTGGATCAAAC-3'        |

## Supplementary Table S2 (continued)

| Primer                 | Sequence                                     |
|------------------------|----------------------------------------------|
| LPW30741               | 5'-CGACATGACTCATGCCGAG-3'                    |
| LPW30742               | 5'-AGCATGTTTGGCATAGAACGAT-3'                 |
| LPW30743               | 5'-TTGTGGTGTITAGGCAGGCA-3'                   |
| LPW30744               | 5'-TGAGACAGGTAAGTTAGTGCAT-3'                 |
| LPW30745               | 5'-TCGCCATTGACGGTGAAGA-3'                    |
| LPW30746               | 5'-TGCTCATCATGCCAAAGCAT-3'                   |
| LPW30758               | 5'-TGCTGTTTTAGTTGGTTGTCA-3'                  |
| LPW30814               | 5'-TATTGTTGAGTCAAGAGCACCA-3'                 |
| LPW30815               | 5'-TACGCGGTGGGGACATCT-3'                     |
| LPW30818               | 5'-TATTCAAGCTATGGAGGGTGAG-3'                 |
| LPW30836               | 5'-AAGTTGCAGAGGTGGTGGTACA-3'                 |
| LPW30876               | 5'-CTATCTCAGGACCGCTTACCAC-3'                 |
| LPW30877               | 5'-CAGTAGTGGTGCCTACAATGG-3'                  |
| LPW30878               | 5'-TATTGCCGTATGGGGCATT-3'                    |
| LPW30879               | 5'-CAGCACCAGCGAGGTCTTTA-3'                   |
| LPW30924               | 5'-CTCTCTTTGACCTATTGGCTT-3'                  |
| LPW30925               | 5'-CAATCTTCAGGGGTCCGC-3'                     |
| LPW33199               | 5'-TTCGCTAGTTCTTACCGACA-3'                   |
| LPW33200               | 5'-AGCAGCTGCAACATGAATGAA-3'                  |
| LPW33264               | 5'-TTGCGCTTGCTCACCATTAGA-3'                  |
| Oligo dT-anchor primer | 5'-GACCACGCGTATCGATGTCGACTTTTTTTTTTTTTTTT-3' |
